# Supplementary material for: Identification prognosis-associated immune genes in colon adenocarcinoma
Source: PubMed Central journal article supplement (PMC7670579; doi:10.1042/bsr20201734), 2020-11-17
Supplement: BSR-2020-1734_supp.pdf [file BSR-2020-1734_supp.pdf]

|          | <b>pvalue</b> | <b>Hazard ratio</b> |
|----------|---------------|---------------------|
| SLC10A2  | 0.008         | 1.833(1.174–2.860)  |
| CXCL3    | 0.007         | 0.976(0.959–0.993)  |
| NOX4     | 0.009         | 1.603(1.126–2.283)  |
| FABP4    | <0.001        | 1.014(1.007–1.020)  |
| ADIPOQ   | <0.001        | 1.102(1.047–1.160)  |
| CCL19    | 0.006         | 1.030(1.008–1.051)  |
| PLCG2    | 0.003         | 1.676(1.192–2.355)  |
| IGHG1    | <0.001        | 1.001(1.000–1.001)  |
| IGHG4    | 0.008         | 1.000(1.000–1.001)  |
| IGHV4–31 | 0.008         | 1.008(1.002–1.014)  |
| IGHV5–51 | 0.002         | 1.002(1.001–1.003)  |
| IGKV1–33 | 0.002         | 1.030(1.011–1.050)  |
| IGKV1–8  | 0.002         | 1.044(1.015–1.073)  |
| IGLV6–57 | 0.003         | 1.002(1.001–1.003)  |
| SEMA3G   | <0.001        | 1.294(1.124–1.491)  |
| INHBA    | <0.001        | 1.054(1.022–1.086)  |
| STC1     | 0.007         | 1.078(1.020–1.139)  |
| UCN      | 0.003         | 1.386(1.120–1.715)  |
| VIP      | 0.002         | 1.058(1.021–1.096)  |
| NGFR     | <0.001        | 1.201(1.092–1.320)  |
| NPR1     | 0.004         | 1.504(1.136–1.991)  |
| OXTR     | <0.001        | 1.421(1.171–1.724)  |
| PTH1R    | <0.001        | 1.628(1.220–2.173)  |
| TRDC     | 0.009         | 1.148(1.035–1.273)  |

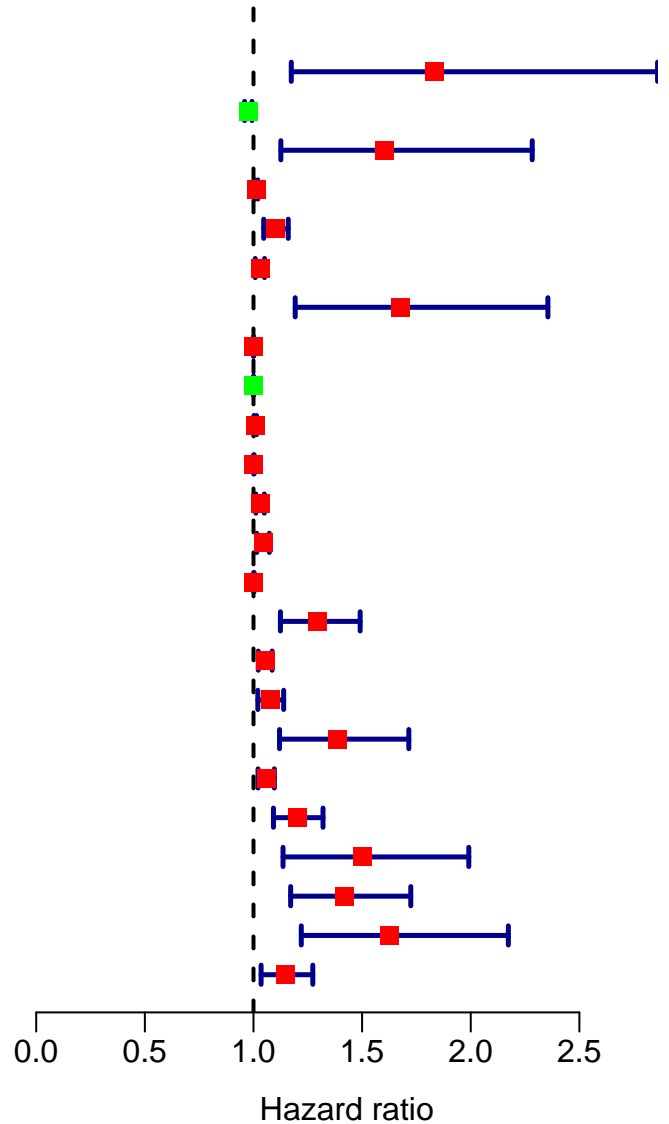

**Figure S1.** The hazard ratios (HR), 95% confidence intervals (CI) calculated by univariate Cox regression.

## Coefficients

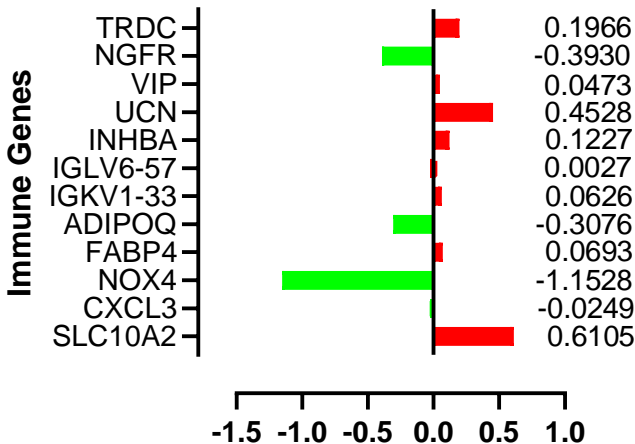

**Figure S2. The coefficient of PRIGs.**

### A TCGA-Univariate analysis

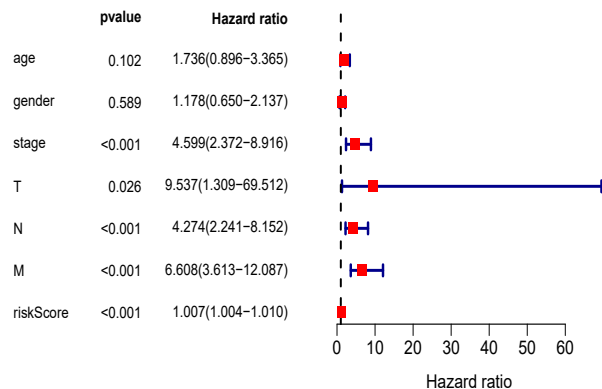

### B TCGA-Multivariate analysis

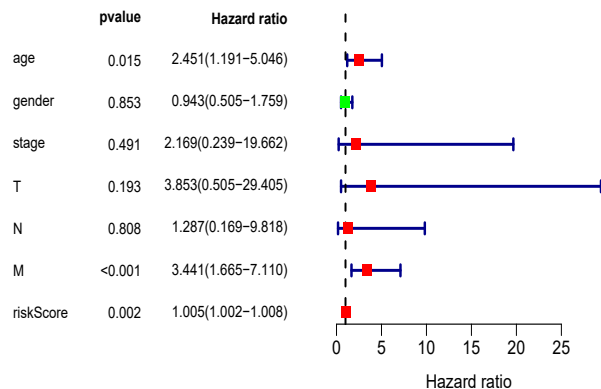

### C GEO-Univariate analysis

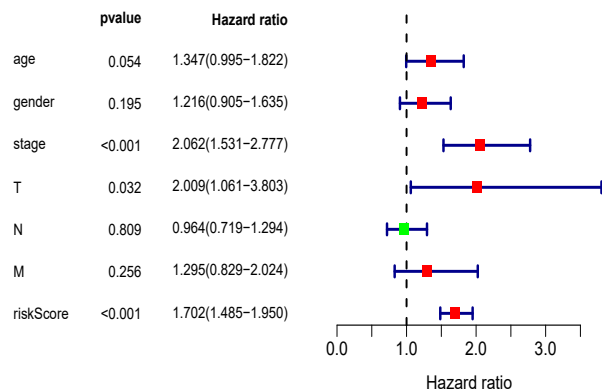

### D GEO-Multivariate analysis

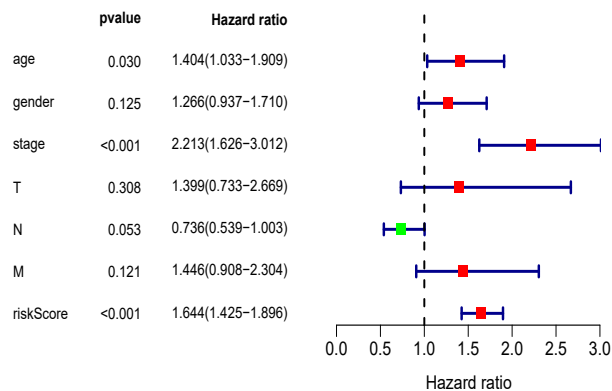

**Figure S3. Prognosis model of immune genes.** (A, C) Univariate Cox regression analysis. Forest plot of the association between risk factors and survival of TCGA-COAD (A) and GEO-COAD (C). (B, D) Multivariate Cox regression analysis. The risk score was an independent prognostic element in TCGA-COAD (B) and GEO-COAD (D).

**Table S1. Characteristics of training and test group.**

|                       |           | <b>TCGA (Training group)</b> | <b>GEO (Test group)</b> |
|-----------------------|-----------|------------------------------|-------------------------|
| <b>Age(years)</b>     |           | 67.01±12.77                  | 66.21±13.23             |
| <b>Gender</b>         | Female    | 180                          | 262                     |
|                       | Male      | 205                          | 325                     |
| <b>Stage</b>          | Stage I   | 66                           | 45                      |
|                       | Stage II  | 151                          | 271                     |
|                       | Stage III | 103                          | 212                     |
|                       | Stage IV  | 54                           | 56                      |
|                       | Unknow    | 11                           | 3                       |
| <b>T (Tumor)</b>      | T1        | 10                           | 11                      |
|                       | T2        | 68                           | 57                      |
|                       | T3        | 263                          | 388                     |
|                       | T4        | 44                           | 108                     |
|                       | Tis       | 1                            | 3                       |
|                       | Unknow    | 0                            | 20                      |
|                       | N0        | 231                          | 317                     |
| <b>N (Lymph Node)</b> | N1        | 88                           | 141                     |
|                       | N2        | 66                           | 99                      |
|                       | N3        | 0                            | 5                       |
|                       | NX        | 0                            | 25                      |
| <b>M (Metastasis)</b> | M0        | 286                          | 508                     |
|                       | M1        | 54                           | 57                      |
|                       | Mx        | 40                           | 3                       |
|                       | Unknow    | 5                            | 19                      |

**Table S2. Prognosis-related immune genes (univariate Cox regression analysis)**

| <b>PRIGs</b> | <b>HR</b>   | <b>HR.95L</b> | <b>HR.95H</b> | <b>P value</b> |
|--------------|-------------|---------------|---------------|----------------|
| CXCL3        | 0.976274178 | 0.959433832   | 0.993410111   | 0.006836376    |
| IGHG4        | 1.000462714 | 1.000118581   | 1.000806966   | 0.008401804    |
| IGHG1        | 1.000557152 | 1.000229499   | 1.000884911   | 0.000858607    |
| IGHV5-51     | 1.00161858  | 1.00058123    | 1.002657006   | 0.00222059     |
| IGLV6-57     | 1.00196457  | 1.000646266   | 1.003284611   | 0.003480915    |
| IGHV4-31     | 1.008180525 | 1.002111576   | 1.014286228   | 0.008176801    |
| FABP4        | 1.013514986 | 1.006982636   | 1.020089712   | 4.72E-05       |
| CCL19        | 1.029586494 | 1.008468596   | 1.051146613   | 0.005824639    |
| IGKV1-33     | 1.030336759 | 1.011010023   | 1.05003295    | 0.001979212    |
| IGKV1-8      | 1.043893862 | 1.015268705   | 1.073326095   | 0.002460688    |
| INHBA        | 1.053507046 | 1.022173509   | 1.085801076   | 0.000715416    |
| VIP          | 1.057597466 | 1.020679968   | 1.095850251   | 0.002007728    |
| STC1         | 1.077990496 | 1.020432945   | 1.138794584   | 0.007308441    |
| ADIPOQ       | 1.101937111 | 1.046564847   | 1.160239044   | 0.000224086    |
| TRDC         | 1.148292064 | 1.035438282   | 1.273445928   | 0.008799448    |
| NGFR         | 1.200503367 | 1.092020089   | 1.319763572   | 0.000155797    |
| SEMA3G       | 1.294274954 | 1.123577659   | 1.490905097   | 0.000350682    |
| UCN          | 1.386191418 | 1.120402289   | 1.715032777   | 0.002640879    |
| OXTR         | 1.420766913 | 1.170702262   | 1.72424594    | 0.000377164    |
| NPR1         | 1.504102806 | 1.13612177    | 1.991270048   | 0.004351938    |
| NOX4         | 1.603287544 | 1.126141305   | 2.282600714   | 0.008816796    |
| PTH1R        | 1.628067123 | 1.219526757   | 2.173468145   | 0.000945574    |
| PLCG2        | 1.675520381 | 1.192276181   | 2.354629398   | 0.002949259    |
| SLC10A2      | 1.832753743 | 1.174436133   | 2.860084245   | 0.007628351    |
